# Supplementary material for: MS-Based Metabolite Profiling of Aboveground and Root Components of Zingiber mioga and Officinale
Source: PubMed Central journal article supplement (PMC6332244; doi:10.3390/molecules200916170), 2015-09-03
Supplement: molecules-20-16170-s001.pdf [file molecules-20-16170-s001.pdf]

## Supplementary Information

**Table S1.** Differential Metabolites Identified Using GC-TOF-MS in *Z. officinale* and *Z. mioga* with their different parts.

| No.                  | TR(min) <sup>a</sup> | Unique Mass <sup>b</sup> | Tentative Metabolite <sup>c</sup> | Derivatized <sup>d</sup> | MS Fragmentation Pattern <sup>e</sup> | ID <sup>f</sup> |
|----------------------|----------------------|--------------------------|-----------------------------------|--------------------------|---------------------------------------|-----------------|
| <i>Organic Acids</i> |                      |                          |                                   |                          |                                       |                 |
| 1                    | 4.99                 | 173                      | Hexanoic acid *                   | x3                       | 58,117,173                            | MS              |
| 2                    | 5.04                 | 134                      | Acetic acid *                     | x3                       | 73,103,134,177,205                    | STD,MS          |
| 3                    | 5.16                 | 72                       | Pyruvic acid *                    | x6                       | 72,107,134,147,184,200                | STD,MS          |
| 4                    | 5.87                 | 191                      | Propanoic acid ***                | x2                       | 100,103,117,177,191,000               | MS              |
| 5                    | 5.92                 | 145                      | Butanoic acid *                   | x3                       | 45,100,145,187,219                    | MS              |
| 6                    | 6.02                 | 130                      | D-2-Aminobutyric acid *           | x3                       | 73,117,130,177,207                    | STD,MS          |
| 7                    | 6.15                 | 211                      | Phosphoric acid **                | x3                       | 103,133,163,211,241                   | STD,MS          |
| 8                    | 6.76                 | 179                      | Benzoic acid *                    | x1                       | 77,119,179,189                        | MS              |
| 9                    | 7.24                 | 91                       | Phenylacetic acid *               | x2                       | 59,91,117,142,174,180                 | STD,MS          |
| 10                   | 7.33                 | 247                      | Succinic acid *                   | x3                       | 45,73,129,172,247                     | STD,MS          |
| 11                   | 7.62                 | 99                       | Fumaric acid *                    | x3                       | 99,115,171,184,218,200                | STD,MS          |
| 12                   | 8.14                 | 129                      | Glutaric acid **                  | x3                       | 73,97,129,203,233,261                 | MS              |
| 13                   | 9.02                 | 189                      | meso-Erythritol **                | x3                       | 86,100,174,201,243                    | STD,MS          |
| 14                   | 9.36                 | 189                      | Pentitol *                        | x3                       | 117,189,217,307                       | MS              |
| 15                   | 9.47                 | 219                      | Glycerol **                       | x3                       | 117,189,219,246,321                   | MS              |
| 16                   | 10.14                | 117                      | Ethylmalonic acid ***             | x3                       | 55,95,117,201,257                     | STD,MS          |
| 17                   | 11.45                | 133                      | Citric acid ***                   | x4                       | 133,157,183,273,375                   | STD,MS          |
| <i>Amino Acids</i>   |                      |                          |                                   |                          |                                       |                 |
| 18                   | 7.31                 | 277                      | Glycine *                         | x3                       | 45,73,129,174,247,277                 | STD,MS          |
| 19                   | 7.85                 | 306                      | Serine ***                        | x3                       | 100,188,204,278,306                   | STD,MS          |
| 20                   | 9.19                 | 232                      | L-Aspartic acid *                 | x3                       | 100,147,202,232                       | STD,MS          |
| 21                   | 9.39                 | 292                      | L-Threonic acid *                 | x4                       | 117,189,220,292                       | STD,MS          |
| 22                   | 10.04                | 328                      | Phenylalanine **                  | x2                       | 100,192,218,266,328                   | STD,MS          |
| 23                   | 10.38                | 258                      | L-Asparagine **                   | x3                       | 116,188,231,258                       | STD,MS          |
| 24                   | 12.25                | 100                      | L-Tyrosine *                      | x3                       | 103,179,218,280,319                   | STD,MS          |
| <i>Fatty Acids</i>   |                      |                          |                                   |                          |                                       |                 |
| 25                   | 13.85                | 337                      | Linoleic acid *                   | x1                       | 95,129,178,220,262                    | STD,MS          |
| 26                   | 13.91                | 108                      | $\alpha$ -Linolenic acid **       | x1                       | 73,93,108,129,191,335                 | STD,MS          |
| 27                   | 14.01                | 341                      | Stearic acid *                    | x1                       | 95,201,313,341                        | STD,MS          |
| 28                   | 15.12                | 369                      | Arachidic acid *                  | x1                       | 73,117,204,341,369                    | STD,MS          |
| 29                   | 15.89                | 459                      | Palmitic acid *                   | x2                       | 203,239,313,371,459                   | STD,MS          |
| <i>Sugars</i>        |                      |                          |                                   |                          |                                       |                 |
| 30                   | 11.88                | 307                      | D-Tagatose *                      | x6                       | 103,189,217,277,307                   | STD,MS          |
| 31                   | 12.07                | 320                      | D-Mannose **                      | (MEOX) <sub>x2</sub> x5  | 73,103,147,205,319                    | STD,MS          |
| 32                   | 12.21                | 319                      | D-Galactose *                     | (MEOX) <sub>x2</sub> x5  | 73,103,147,205,319                    | STD,MS          |
| 33                   | 12.97                | 277                      | L-Fucitol *                       | x3                       | 117,191,217,277,319                   | STD,MS          |
| 34                   | 14.58                | 204                      | Glyceryl-glycoside *              | x6                       | 103,204,243,305,337                   | MS              |

<sup>a</sup> TR(min) is the retention time. <sup>b</sup> Unique Mass are the selected ions(s) and quantification of individual derivatized metabolites. <sup>c</sup> Identified metabolites based on the STD. <sup>d</sup> Derivatized MEOX, methyloxime; TMS, trimethylsilyl. <sup>e</sup> MS fragmentation is the fragmentation of Tentative compound. Identification: STD mass spectrum was consistent with those of standard compounds: Highest similarity with the Hit list. In the tentative compounds, \* represents the metabolites differentiated by VIP value 1, \*\* represents metabolites differentiated both by VIP value 1 and 2, and \*\*\* represents metabolites differentiated by VIP value 2. All metabolites are selected by  $Vip > 0.7$  &  $p\text{-value} < 0.05$ .

### Organic acids

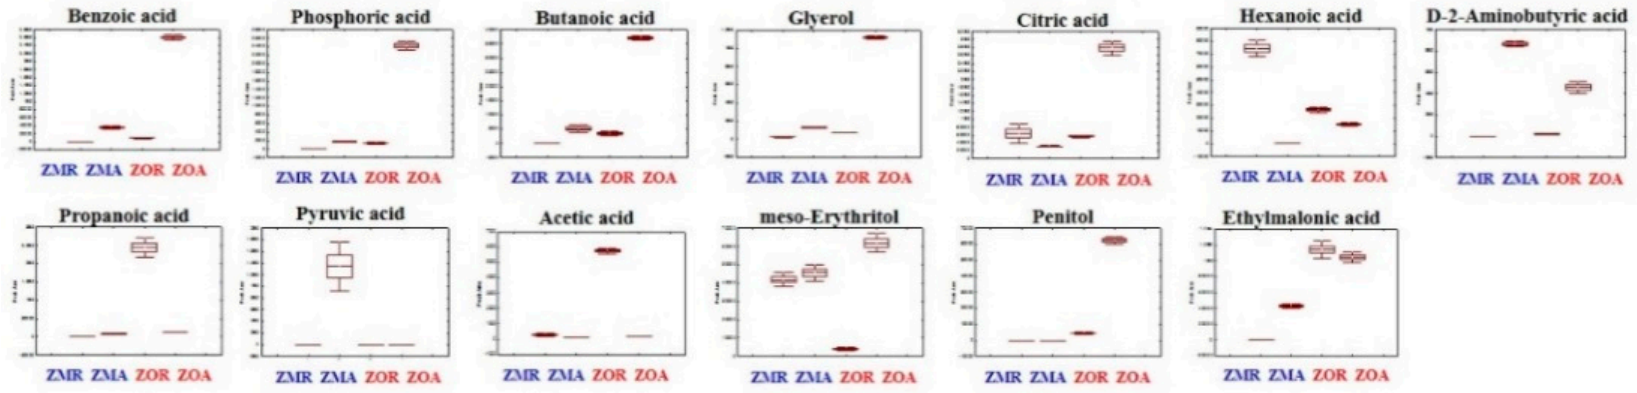

### Amino acids

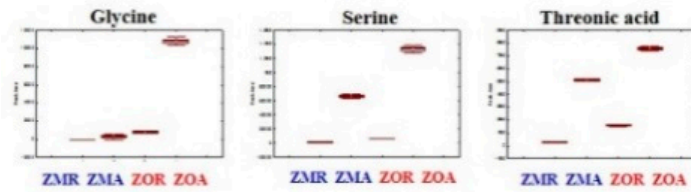

### Fatty acids

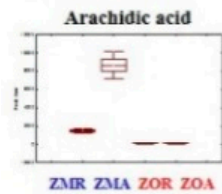

### Sugars

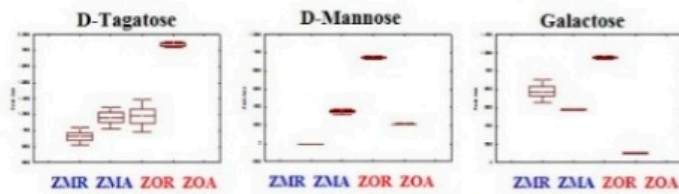

**Figure S1.** Box and whisker plots of significantly different metabolites between *Z. officinale* and *Z. mioga* with their different parts analyzed by GC-TOF-MS.

**Table S2.** Differential Metabolites Identified Using UPLC-Q-TOF-MS in *Z. officinale* and *Z. mioga* with their different parts.

| No.                | Vip  | T <sub>R</sub> (min) | Tentative Compound                  | Measured Mass ( <i>m/z</i> ) |                      | Elemental Composition                                         | <i>i</i> -FIT(norm) | Error(ppm) | Ref.       |
|--------------------|------|----------------------|-------------------------------------|------------------------------|----------------------|---------------------------------------------------------------|---------------------|------------|------------|
|                    |      |                      |                                     | [M + H] <sup>+</sup>         | [M - H] <sup>-</sup> |                                                               |                     |            |            |
| <i>Amino Acids</i> |      |                      |                                     |                              |                      |                                                               |                     |            |            |
| 1                  | 1.24 | 1.29                 | Isoleucine ***                      | 132.1014                     | 130.0880             | C <sub>6</sub> H <sub>13</sub> NO <sub>2</sub>                | 0                   | 6.9        | CCD        |
| 2                  | 1.39 | 2.04                 | Phenylalanine ***                   | 166.0870                     | 164.0720             | C <sub>9</sub> H <sub>11</sub> NO <sub>2</sub>                | 0                   | 4.3        | CCD        |
| 3                  | 1.35 | 2.10                 | 2-(Methylamino)benzoic acid ***     | 166.0898                     | 164.0720             | C <sub>9</sub> H <sub>11</sub> NO <sub>2</sub>                | 0                   | 3.7        | CCD        |
| 4                  | 1.08 | 2.88                 | Tryptophan ***                      | 188.0724                     | 203.0840             | C <sub>11</sub> H <sub>12</sub> N <sub>2</sub> O <sub>2</sub> | 0.1                 | -2         | CCD        |
| <i>Flavonoids</i>  |      |                      |                                     |                              |                      |                                                               |                     |            |            |
| 5                  | 1.28 | 3.15                 | Kaempferol diglycoside ***          | 623.1606                     | 621.1471             | C <sub>28</sub> H <sub>30</sub> O <sub>16</sub>               | 2                   | 0.2        | [33]       |
| 6                  | 1.35 | 3.64                 | Delphinidin (glucoside) ***         | 303.0526                     | N.D.                 | C <sub>15</sub> H <sub>10</sub> O <sub>7</sub>                | 0.1                 | 3          | [34,36]    |
| 7                  | 1.33 | 3.64                 | Rutin ***                           | 611.1616                     | 609.145              | C <sub>27</sub> H <sub>30</sub> O <sub>16</sub>               | 0.1                 | -1         | CCD        |
| 8                  | 1.30 | 3.66                 | Kaempferol rhamnoside xyloside ***  | 565.1570                     | 563.1428             | C <sub>26</sub> H <sub>28</sub> O <sub>14</sub>               | 2.1                 | -1.2       | [33]       |
| 9                  | 1.30 | 3.79                 | Cyanidin (coumaroyl glucoside) ***  | 287.0574                     | N.D.                 | C <sub>15</sub> H <sub>9</sub> O <sub>6</sub>                 | 1.7                 | 1          | [33,34,37] |
| 10                 | 1.30 | 3.85                 | Delphinidin coumaroyl glucoside *** | 611.1616                     | 609.1450             | C <sub>27</sub> H <sub>30</sub> O <sub>16</sub>               | 0.1                 | -1         | [33,34,37] |
| 11                 | 1.30 | 3.87                 | Diacetylfazelin ***                 | 517.1384                     | N.D.                 | C <sub>25</sub> H <sub>24</sub> O <sub>12</sub>               | 0                   | 0          | CCD        |
| 12                 | 1.47 | 3.91                 | Pentahydroxyflavone ***             | 303.0532                     | 301.0356             | C <sub>15</sub> H <sub>10</sub> O <sub>7</sub>                | 0.5                 | 7.9        | CCD        |
| 13                 | 1.54 | 4.12                 | Cyanidin coumaroyl glucoside ***    | 595.1741                     | 593.1510             | C <sub>30</sub> H <sub>27</sub> O <sub>13</sub>               |                     |            | [33,34,37] |
| 14                 | 1.24 | 4.17                 | Hemsleyanoside ***                  | 549.1615                     | 547.1489             | C <sub>26</sub> H <sub>28</sub> O <sub>13</sub>               | 0.2                 | -3.1       | CCD        |
| 15                 | 1.30 | 4.28                 | Galangin ***                        | 271.0633                     | 134.0372 (M-2H)      | C <sub>15</sub> H <sub>10</sub> O <sub>5</sub>                | 0.3                 | 10         | CCD        |
| <i>Oils</i>        |      |                      |                                     |                              |                      |                                                               |                     |            |            |
| 16                 | 0.89 | 5.84                 | Trihydroxyoctadecenoic acid ***     | N.D                          | 329.1380             | C <sub>18</sub> H <sub>34</sub> O <sub>5</sub>                | 2.1                 | 1.2        | CCD        |
| 17                 | 1.29 | 6.63                 | Aminoheptadecanediol **             | 274.2764                     | N.D                  | C <sub>16</sub> H <sub>35</sub> NO <sub>2</sub>               | 0                   | 0.4        | CCD        |
| 18                 | 1.24 | 7.22                 | Aminooctadecanetriol *              | 316.2856                     | N.D                  | C <sub>18</sub> H <sub>37</sub> NO <sub>3</sub>               | 0                   | -1.6       | CCD        |
| 19                 | 1.82 | 7.47                 | Aminooctadecanediol **              | 302.3070                     | N.D                  | C <sub>18</sub> H <sub>39</sub> NO <sub>2</sub>               | 0                   | 2.6        | CCD        |
| 20                 | 1.12 | 8.12                 | Oxo-octadecenoic acid ***           | 364.3234                     | N.D                  | C <sub>23</sub> H <sub>41</sub> NO <sub>2</sub>               | 0                   | 5.2        | CCD        |
| 21                 | 1.21 | 8.28                 | Aminoicosanediol ***                | 330.3311                     | N.D                  | C <sub>20</sub> H <sub>43</sub> NO <sub>2</sub>               | 0                   | 0.6        | CCD        |
| 22                 | 1.47 | 8.41                 | Aminomethylnonadecanetriol ***      | 346.3339                     | N.D                  | C <sub>20</sub> H <sub>43</sub> NO <sub>3</sub>               | 0                   | 6.6        | CCD        |
| 23                 | 1.27 | 8.88                 | Aminoheneicosenediol ***            | 342.3327                     | N.D                  | C <sub>21</sub> H <sub>43</sub> NO <sub>2</sub>               | 0.2                 | -2         | CCD        |

| No.           | Vip  | T <sub>R</sub> (min) | Tentative Compound              | Measured Mass ( <i>m/z</i> ) |                      | Elemental Composition                           | <i>i</i> -FIT(norm) | Error(ppm) | Ref.         |
|---------------|------|----------------------|---------------------------------|------------------------------|----------------------|-------------------------------------------------|---------------------|------------|--------------|
|               |      |                      |                                 | [M + H] <sup>+</sup>         | [M – H] <sup>-</sup> |                                                 |                     |            |              |
| 24            | 1.31 | 9.29                 | Halaminol A ***                 | 228.2347                     | N.D                  | C <sub>14</sub> H <sub>29</sub> NO              | 0                   | 3.1        | CCD          |
| 25            | 1.26 | 9.50                 | Palmitoleamide ***              | 254.2499                     | N.D                  | C <sub>16</sub> H <sub>31</sub> NO              | 0                   | 8.3        | CCD          |
| 26            | 1.11 | 10.10                | Palmitic acid *                 | N.D                          | 255.2330             | C <sub>16</sub> H <sub>32</sub> O <sub>2</sub>  | 0                   | 0.8        | CCD          |
| 27            | 1.26 | 10.42                | Oleamide *                      | 282.2806                     | N.D.                 | C <sub>18</sub> H <sub>35</sub> NO              | 0                   | -2.5       | CCD          |
| <b>Others</b> |      |                      |                                 |                              |                      |                                                 |                     |            |              |
| 27            | 1.55 | 5.23                 | Diarylheptanoid **              | N.D                          | 389.1600             | C <sub>21</sub> H <sub>26</sub> O <sub>7</sub>  | 1.1                 | -5.9       | CCD, [45]    |
| 28            | 1.23 | 5.81                 | [6]-Gingerdiol ***              | 353.2330                     | N.D                  | C <sub>20</sub> H <sub>32</sub> O <sub>5</sub>  | 3.7                 | -2         | CCD, [13]    |
| 29            | 1.40 | 5.84                 | Tetrahydrocurcumin <sup>a</sup> | 373.1660                     | 371.1461             | C <sub>21</sub> H <sub>24</sub> O <sub>6</sub>  | 0.1                 | 3.2        | CCD, [39,41] |
| 30            | 0.90 | 5.85                 | Galanganol C ***                | 455.1699<br>(M + Na)         | 431.1740             | C <sub>23</sub> H <sub>28</sub> O <sub>8</sub>  | 0.4                 | -7         | CCD          |
| 31            | 0.92 | 6.29                 | Gingerenone A ***               | 357.1679                     | 355.1530             | C <sub>21</sub> H <sub>24</sub> O <sub>5</sub>  | 1                   | -1.7       | CCD          |
| 32            | 0.92 | 7.16                 | Curcumadiol ***                 | N.D                          | 237.1110             | C <sub>15</sub> H <sub>26</sub> O <sub>2</sub>  | 0.1                 | -3.4       | CCD          |
| 33            | 0.82 | 7.62                 | [8]-Gingerol *                  | N.D                          | 321.2050             | C <sub>19</sub> H <sub>30</sub> O <sub>4</sub>  | 2.8                 | -1.9       | [12,13,46]   |
| 34            | 1.33 | 7.81                 | Labdene-diol *                  | 441.3247                     | N.D                  | C <sub>25</sub> H <sub>44</sub> O <sub>6</sub>  | 0.5                 | -2         | CCD          |
| 35            | 1.47 | 8.61                 | Gingerglycolipid A **           | 677.3791                     | N.D                  | C <sub>33</sub> H <sub>56</sub> O <sub>14</sub> | 1.4                 | -3.5       | CCD          |
| 36            | 1.80 | 8.72                 | [8]-Paradol *                   | N.D                          | 305.2090             | C <sub>19</sub> H <sub>30</sub> O <sub>3</sub>  | 0                   | 0.3        | [13]         |

In the tentative compounds, \* represents the metabolites differentiated by VIP value 1, \*\* represents metabolites differentiated both by VIP value 1 and 2, and \*\*\* represents metabolites differentiated by VIP value 2. Metabolites identified by Dictionary of Natural Products are marked with CCD. N.D. represents for not detected. All metabolites are selected by Vip > 0.7 & *p*-value < 0.05.

## Oil &amp; Others

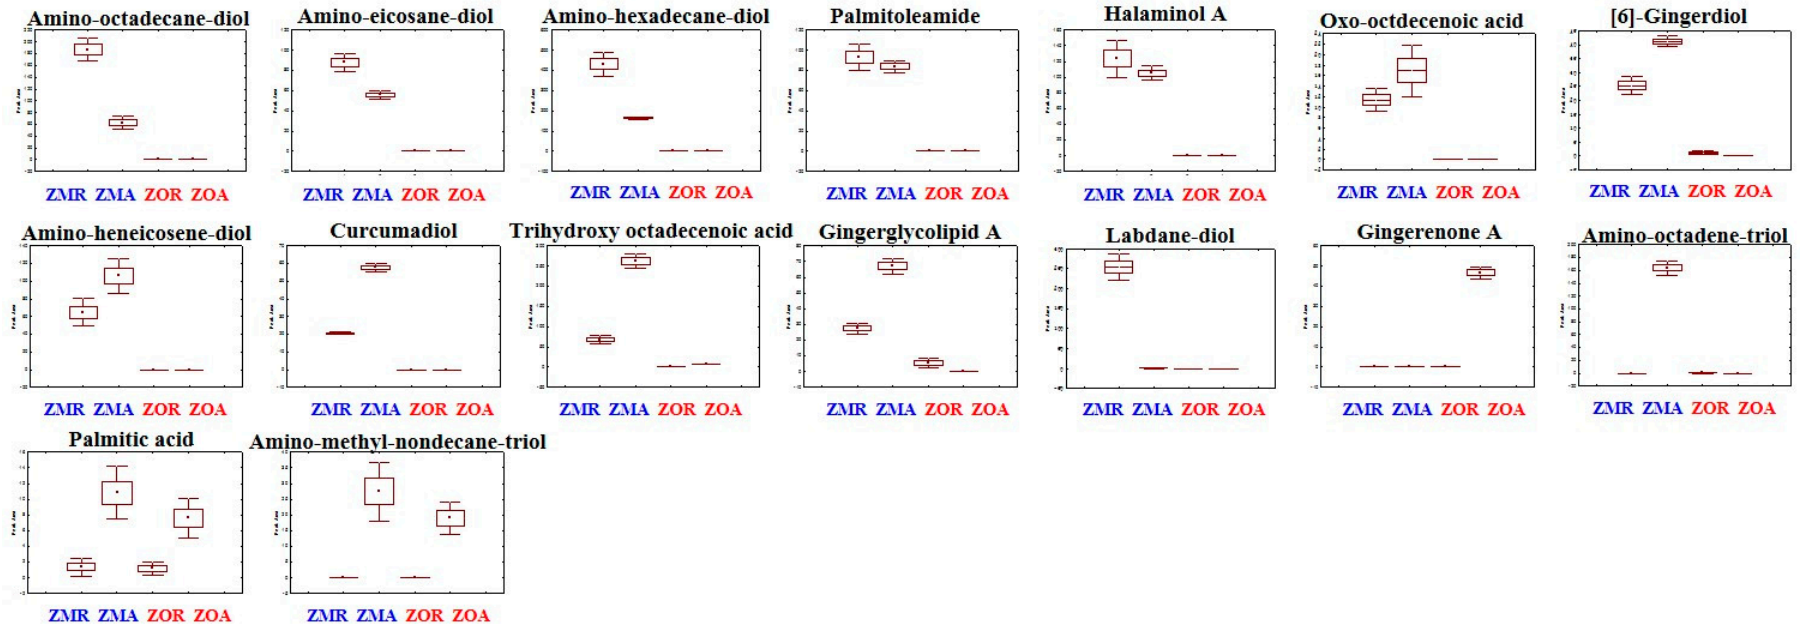

**Figure S2.** Box and whisker plot of significantly different metabolites between *Z. officinale* and *Z. mioga* with their different parts analyzed by UPLC-Q-TOF-MS.
